# Supplementary material for: Immunotoxicity of nanoparticles: a computational study suggests that CNTs and C60 fullerenes might be recognized as pathogens by Toll-like receptors
Source: Royal Society of Chemistry journal article supplement (doi:10.1039/c3nr05772k), 2014-01-01
Supplement: c3nr05772k.pdf [file c3nr05772k.pdf]

## Supplementary Information

# Immunotoxicity of nanoparticles: carbon nanostructures can be recognized as pathogens by Toll-like receptors

*Turabekova M.,<sup>†</sup> Rasulev B.,<sup>†</sup> Theodore M.,<sup>‡</sup> Jackman J.,<sup>‡</sup> Leszczynska D.,<sup>§</sup> Leszczynski J.<sup>†\*</sup>*

<sup>†</sup>Interdisciplinary Center for Nanotoxicity, Department of Chemistry, Jackson State University, 1400 J. R. Lynch Street, P. O. Box 17910, Jackson, MS 39217, USA

<sup>§</sup>Interdisciplinary Nanotoxicity Center, Department of Civil and Environmental Engineering, Jackson State University, Jackson MS, USA

<sup>‡</sup>The Johns Hopkins University, Applied Physics Laboratory, Laurel, MD 20723, USA

**Table S1.** A panel of cytokine expressions for C60 and CNT.

| Description   | IL-1 $\beta$ | IL-2 | IL-4 | IL-5 | IL-6  | IL-7 | IL-8   | IL-10 | IL-12 (p70) | IL-13 | IL-17 | G-CSF | GM-CSF | IFN- $\gamma$ | MCP-1   | MIP-1 $\beta$ | TNF- $\alpha$ |
|---------------|--------------|------|------|------|-------|------|--------|-------|-------------|-------|-------|-------|--------|---------------|---------|---------------|---------------|
| C60 200 PI    | 0.145        | 0    | 0    | 0    | 0.535 | 0    | 84.905 | 0.01  | 0.065       | 0.12  | 0.16  | 0     | 0      | 0             | 185.06  | 0             | 0.73          |
| C60 20 PI     | 0.14         | 0    | 0    | 0    | 0.535 | 0.09 | 85.11  | 0.08  | 0.175       | 0.12  | 0.75  | 0     | 0      | 0             | 191.34  | 0             | 1.245         |
| C60 2 PI      | 0.15         | 0    | 0    | 0    | 0.55  | 0.09 | 89.69  | 0.14  | 0.085       | 0.1   | 0.345 | 0     | 0      | 0             | 193.255 | 0             | 0.93          |
| CNT 200 PI    | 0.14         | 0    | 0    | 0    | 0.455 | 0    | 90.465 | 0.025 | 0.135       | 0.16  | 0     | 0     | 0      | 0             | 185.88  | 0             | 0.76          |
| CNT 20 PI     | 0.15         | 0    | 0    | 0    | 0.485 | 0    | 80.115 | 0     | 0.02        | 0.125 | 0.015 | 0     | 0      | 0             | 179.82  | 0             | 0.665         |
| CNT 2 PI      | 0.15         | 0    | 0    | 0    | 0.46  | 0    | 85.96  | 0.005 | 0.035       | 0.12  | 0     | 0     | 0      | 0             | 192.965 | 0             | 0.635         |
| C60 200 NO PI | 0.135        | 0    | 0    | 0    | 0.45  | 0    | 77.795 | 0.005 | 0.02        | 0.09  | 0     | 0     | 0      | 0             | 188.77  | 0             | 0.54          |
| C60 20 NO PI  | 0.155        | 0    | 0    | 0    | 0.39  | 0    | 76.495 | 0     | 0           | 0.105 | 0     | 0     | 0      | 0             | 176.105 | 0             | 0.35          |
| C60 2 NO PI   | 0.225        | 0    | 0    | 0.02 | 0.5   | 0    | 75.695 | 0.105 | 0.13        | 0.27  | 0     | 0     | 0      | 0             | 173.875 | 0             | 0.6           |
| CNT 200 NO PI | 0.14         | 0    | 0    | 0    | 0.44  | 0    | 80.28  | 0     | 0.06        | 0.11  | 0     | 0     | 0      | 0             | 191.56  | 0             | 0.6           |
| CNT 20 NO PI  | 0.145        | 0    | 0    | 0    | 0.365 | 0    | 78.9   | 0     | 0.005       | 0.06  | 0     | 0     | 0      | 0             | 185.285 | 0             | 0.355         |
| CNT 2 NO PI   | 0.17         | 0    | 0    | 0    | 0.44  | 0    | 68.645 | 0     | 0           | 0.145 | 0     | 0     | 0      | 0             | 169.97  | 0             | 0.235         |
| NO CELLS      | 0.24         | 0    | 0    | 0.03 | 0.395 | 0    | 21.43  | 0.065 | 0.02        | 0.275 | 0     | 0     | 0      | 0             | 42.25   | 0             | 0.32          |
| POS CONT      | 0.135        | 0    | 0    | 0    | 0.41  | 0    | 59.9   | 0     | 0.225       | 0.23  | 0     | 0     | 8.44   | 0             | 119.87  | 0             | 0             |
| NEG CONT      | 0.135        | 0    | 0    | 0    | 0.415 | 0    | 73.565 | 0     | 0.055       | 0.085 | 0     | 0     | 0      | 0             | 170.83  | 0             | 0.195         |
| VEHICLE CONT  | 0.205        | 0    | 0    | 0    | 0.47  | 0    | 78.055 | 0     | 0.085       | 0.185 | 0     | 0     | 0      | 0             | 194.895 | 0             | 0.555         |
| LPS CONT      | 0.26         | 0    | 0    | 0.03 | 0.49  | 0    | 68.905 | 0.055 | 0.125       | 0.285 | 0     | 0     | 0      | 0             | 174.39  | 0             | 0.38          |
| C60 200 PI    | 0.2          | 0    | 0    | 0.07 | 0.02  | 0.22 | 93.915 | 0.16  | 0           | 0     | 0     | 0     | 0      | 4.84          | 228.34  | 0             | 1.215         |
| C60 20 PI     | 0.165        | 0    | 0    | 0.07 | 0.045 | 0.22 | 90     | 0.09  | 0           | 0     | 0     | 0     | 0      | 4.15          | 230.78  | 0             | 1.26          |
| C60 2 PI      | 0.2          | 0    | 0    | 0.09 | 0.055 | 0.15 | 84.81  | 0.045 | 0           | 0     | 0     | 0     | 0      | 2.38          | 206.715 | 0             | 0.99          |
| CNT 200 PI    | 0.195        | 0    | 0    | 0.03 | 0     | 0.36 | 84.775 | 0.075 | 0           | 0     | 0     | 0     | 0      | 1.655         | 204.385 | 0             | 0.945         |
| CNT 20 PI     | 0.175        | 0    | 0    | 0.04 | 0     | 0    | 84.7   | 0     | 0           | 0     | 0     | 0     | 0      | 1.64          | 214.49  | 0             | 1.08          |
| CNT 2 PI      | 0.17         | 0    | 0    | 0.06 | 0     | 0.26 | 87.33  | 0.075 | 0           | 0     | 0     | 0     | 0      | 1.655         | 223.72  | 0             | 1.17          |
| C60 200 NO PI | 0.165        | 0    | 0    | 0.05 | 0     | 0.26 | 82.525 | 0     | 0           | 0     | 0     | 0     | 0      | 0.535         | 203.045 | 0             | 0.99          |
| C60 20 NO PI  | 0.175        | 0    | 0    | 0.07 | 0     | 0.15 | 78.02  | 0     | 0           | 0     | 0     | 0     | 0      | 0.27          | 183.36  | 0             | 0.715         |

|               |       |   |     |      |       |      |        |       |       |       |   |   |   |       |         |   |       |
|---------------|-------|---|-----|------|-------|------|--------|-------|-------|-------|---|---|---|-------|---------|---|-------|
| C60 2 NO PI   | 0.18  | 0 | 0   | 0.05 | 0     | 0    | 77.56  | 0     | 0     | 0     | 0 | 0 | 0 | 0.915 | 189.465 | 0 | 0.765 |
| CNT 200 NO PI | 0.165 | 0 | 0   | 0.03 | 0     | 0.36 | 71.79  | 0.025 | 0     | 0     | 0 | 0 | 0 | 0.73  | 183.995 | 0 | 0.81  |
| CNT 20 NO PI  | 0.185 | 0 | 0   | 0.03 | 0     | 0.08 | 78.185 | 0     | 0     | 0     | 0 | 0 | 0 | 0.46  | 196.05  | 0 | 0.765 |
| CNT 2 NO PI   | 0.17  | 0 | 0   | 0.05 | 0     | 0.08 | 76.465 | 0     | 0     | 0     | 0 | 0 | 0 | 0.73  | 193.24  | 0 | 0.765 |
| NO CELLS      | 0.16  | 0 | 0   | 0.03 | 0.03  | 0.15 | 41.66  | 0.025 | 0     | 0     | 0 | 0 | 0 | 0.46  | 147.3   | 0 | 0.44  |
| POS CONT      | 0.125 | 0 | 0   | 0.06 | 0     | 0.26 | 55.175 | 0     | 0     | 0     | 0 | 0 | 0 | 0     | 135.25  | 0 | 0.35  |
| NEG CONT      | 0.17  | 0 | 0   | 0.05 | 0     | 0.29 | 73.75  | 0     | 0     | 0     | 0 | 0 | 0 | 0.46  | 196.415 | 0 | 0.63  |
| VEHICLE CONT  | 0.17  | 0 | 0   | 0.02 | 0     | 0.08 | 77.835 | 0     | 0     | 0     | 0 | 0 | 0 | 1.085 | 197.575 | 0 | 0.72  |
| LPS CONT      | 0.175 | 0 | 0   | 0.05 | 0     | 0.15 | 73.645 | 0.045 | 0     | 0     | 0 | 0 | 0 | 0.915 | 213.97  | 0 | 0.99  |
| C60 200 PI    | 0.21  | 0 | 0   | 0.14 | 0.38  | 0.25 | 109.57 | 0     | 0     | 0.395 | 0 | 0 | 0 | 2.66  | 297.805 | 0 | 1.45  |
| C60 20 PI     | 0.185 | 0 | 0   | 0.1  | 0.295 | 0.46 | 112.4  | 0     | 0     | 0.245 | 0 | 0 | 0 | 3.69  | 269.17  | 0 | 1.525 |
| C60 2 PI      | 0.17  | 0 | 0   | 0.09 | 0.26  | 0.16 | 102.22 | 0     | 0     | 0.26  | 0 | 0 | 0 | 1.985 | 238.5   | 0 | 1.375 |
| CNT 200 PI    | 0.165 | 0 | 0   | 0.12 | 0.185 | 0.33 | 93.265 | 0     | 0     | 0.245 | 0 | 0 | 0 | 0.675 | 227.845 | 0 | 1.15  |
| CNT 20 PI     | 0.165 | 0 | 0   | 0.09 | 0.2   | 0.25 | 101.99 | 0     | 0     | 0.265 | 0 | 0 | 0 | 1.485 | 244.29  | 0 | 1.225 |
| CNT 2 PI      | 0.18  | 0 | 0   | 0.1  | 0.305 | 0.08 | 111.74 | 0     | 0     | 0.245 | 0 | 0 | 0 | 2.49  | 264.81  | 0 | 1.3   |
| C60 200 NO PI | 0.165 | 0 | 0   | 0.08 | 0.315 | 0.04 | 86.325 | 0     | 0     | 0.25  | 0 | 0 | 0 | 0.415 | 219.07  | 0 | 1.23  |
| C60 20 NO PI  | 0.18  | 0 | 0   | 0.1  | 0.165 | 0.08 | 78.955 | 0     | 0     | 0.24  | 0 | 0 | 0 | 0.74  | 190.98  | 0 | 1.3   |
| C60 2 NO PI   | 0.155 | 0 | 0   | 0.08 | 0.14  | 0.08 | 78.17  | 0     | 0     | 0.235 | 0 | 0 | 0 | 1.075 | 195.955 | 0 | 1.15  |
| CNT 200 NO PI | 0.165 | 0 | 0   | 0.08 | 0.12  | 0.21 | 73.685 | 0     | 0     | 0.23  | 0 | 0 | 0 | 0.1   | 185.455 | 0 | 1.08  |
| CNT 20 NO PI  | 0.15  | 0 | 0   | 0.1  | 0.135 | 0.08 | 78.68  | 0     | 0     | 0.25  | 0 | 0 | 0 | 0.515 | 183.15  | 0 | 1.115 |
| CNT 2 NO PI   | 0.155 | 0 | 0   | 0.1  | 0.205 | 0.33 | 87.605 | 0     | 0     | 0.25  | 0 | 0 | 0 | 2.105 | 198.975 | 0 | 1.23  |
| NO CELLS      | 0.2   | 0 | 0   | 0.09 | 0.385 | 0.07 | 45.805 | 0     | 0     | 0.225 | 0 | 0 | 0 | 2     | 489.835 | 0 | 1.6   |
| POS CONT      | 0.135 | 0 | 0   | 0.09 | 0.03  | 0    | 70.355 | 0     | 0     | 0.255 | 0 | 0 | 0 | 0     | 180.035 | 0 | 0.79  |
| NEG CONT      | 0.155 | 0 | 0   | 0.08 | 0.155 | 0.16 | 86.88  | 0     | 0     | 0.22  | 0 | 0 | 0 | 0.1   | 226.205 | 0 | 1.225 |
| VEHICLE CONT  | 0.165 | 0 | 0   | 0.1  | 0.14  | 0.12 | 83.895 | 0     | 0     | 0.27  | 0 | 0 | 0 | 0.2   | 243.81  | 0 | 1.08  |
| LPS CONT      | 0.17  | 0 | 0   | 0.08 | 0.135 | 0.16 | 92.815 | 0     | 0     | 0.28  | 0 | 0 | 0 | 1.33  | 279.16  | 0 | 1.01  |
| C60 200 PI    | 0.31  | 0 | 0.2 | 0.05 | 0.18  | 0.3  | 112.5  | 0.3   | 0.18  | 0.33  | 0 | 0 | 0 | 0     | 230.325 | 0 | 0.16  |
| C60 20 PI     | 0.23  | 0 | 0   | 0.04 | 0.105 | 0.13 | 113.08 | 0.26  | 0.25  | 0     | 0 | 0 | 0 | 0     | 219.69  | 0 | 0.505 |
| C60 2 PI      | 0.21  | 0 | 0   | 0.02 | 0.16  | 0.34 | 113.58 | 0.23  | 0.195 | 0     | 0 | 0 | 0 | 0     | 217.1   | 0 | 0.055 |



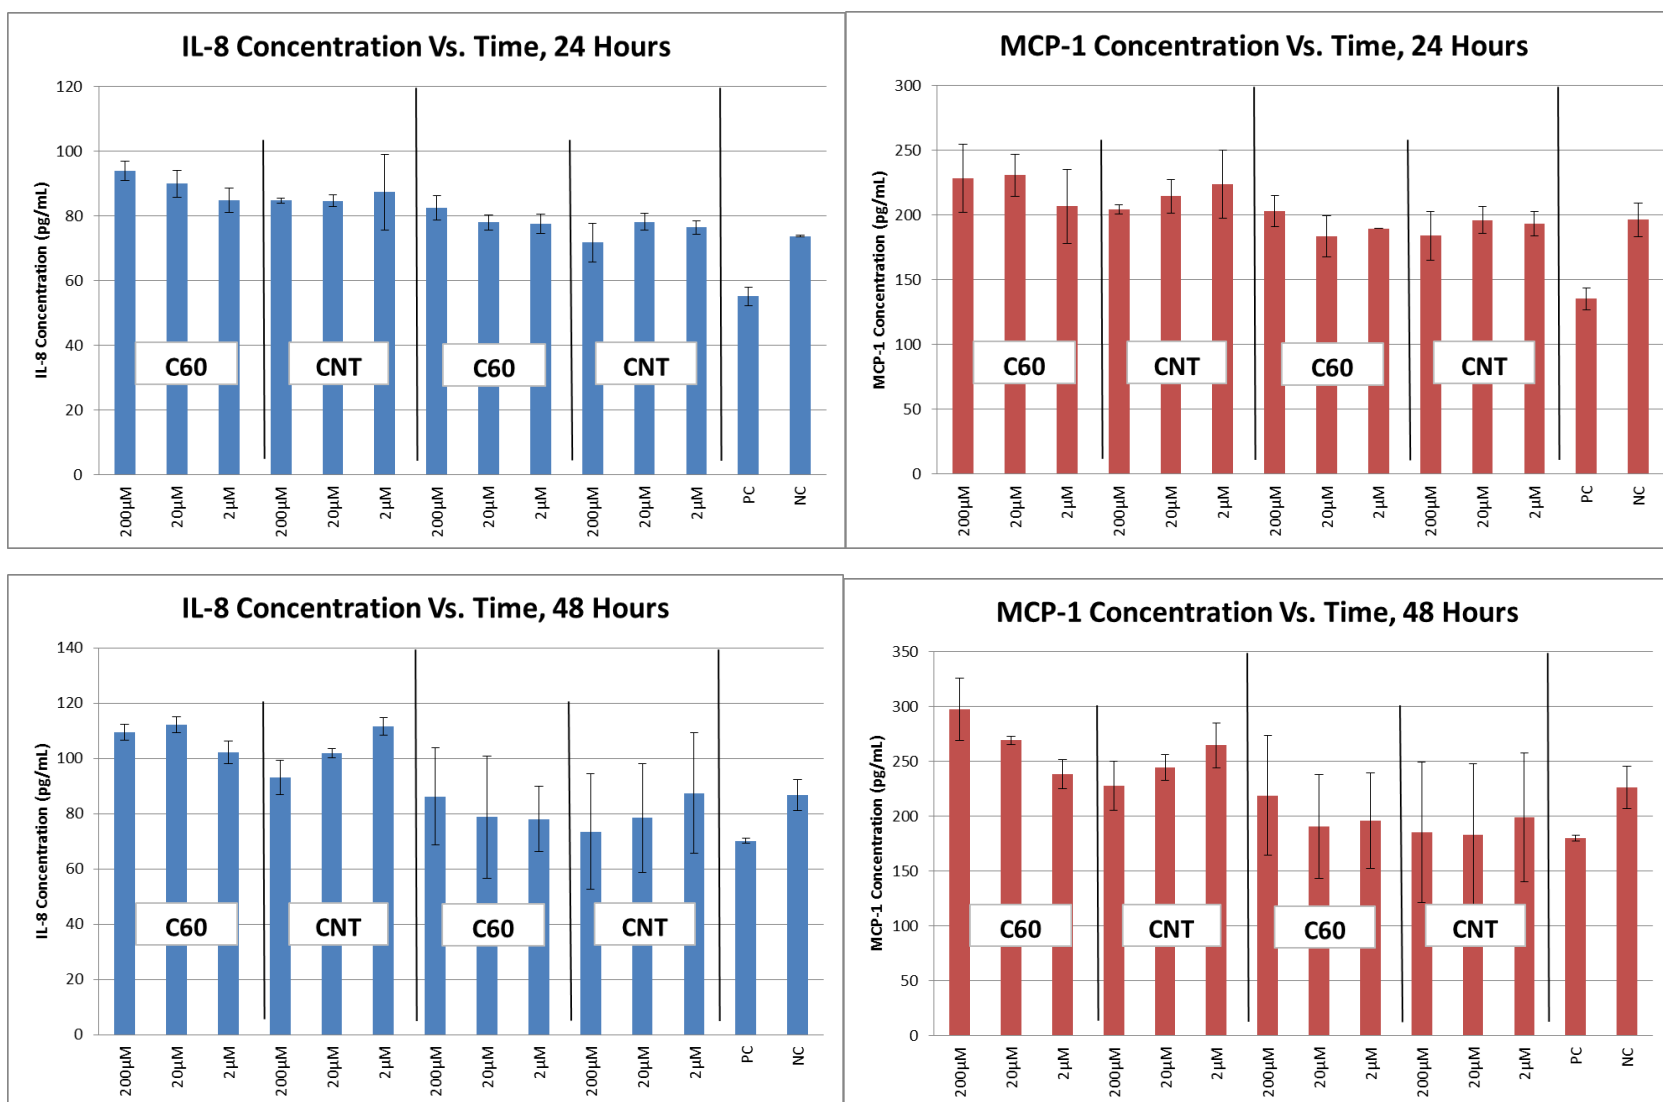

Figure S1. IL-8 and MCP-1 concentration for C<sub>60</sub> and CNTs after 24H, 48H and 72H of exposition.

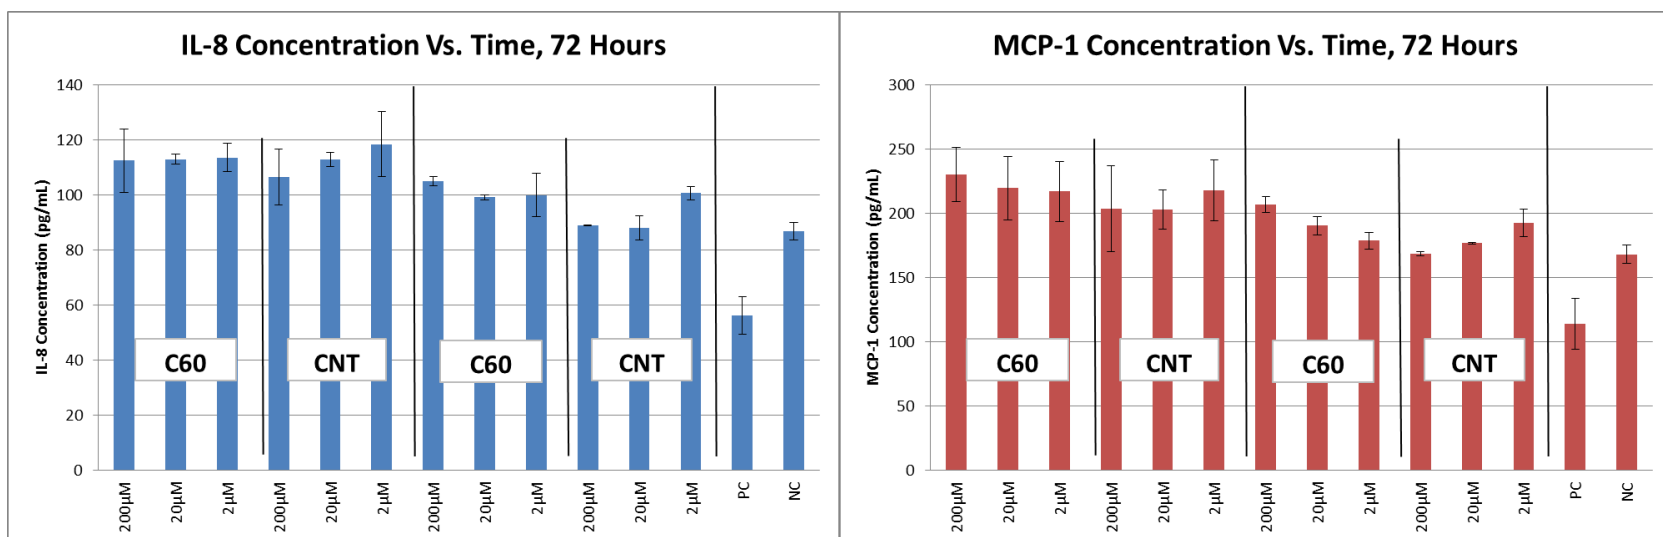

Figure S1. Continuation
